# Supplementary material for: Drug susceptibility and molecular epidemiology of Escherichia coli in bloodstream infections in Shanxi, China
Source: PeerJ. 2021 Oct 25;9:e12371. doi: 10.7717/peerj.12371 (PMC8552779; doi:10.7717/peerj.12371)
Supplement: Supplemental Information 1 [file peerj-09-12371-s001.xls]

## Sheet: Sheet1
Serial number	gender	age	bacteria	am	amc	tzp	cfz	fox	cro	fep	ctx	cps	atm	etp	imp	mep	ak	gen	tob	cip	lev	tgc	sxt	AM	AMC	TZP	CFZ	FOX	CRO	FEP	CTX	CPS	ATM	ETP	IMP	MEP	AK	GEN	TOB	CIP	LEV	TGC	SXT	Resistant phenotype	Drug-resistant type	ESBL	adK	fumC	gyrB
1	male	82	E. coli	≥32	8	≤4	≥8	≤4	≥4	8	≥4	≤16	>16	≤0.5	≤1	≤1	≤4	≥16	8	≥2	≥8	1	≤2	R	S	S	R	S	R	SDD	R	S	R	S	S	S	S	R	I	R	R	S	S	AM,CFZ,CRO,CTX,ATM,GEN,CIP,LEV	MDR	＋	8	7	1
2	female	90	E. coli	≥32	8	≤4	≥8	8	≥4	4	≥4	≤16	>16	≤0.5	≤1	≤1	≤4	≥16	8	≥2	≥8	≤0.5	≥4	R	S	S	R	S	R	SDD	R	S	R	S	S	S	S	R	I	R	R	S	R	AM,CFZ,CRO,CTX,ATM,GEN,CIP,LEV,SXT	MDR	＋	10	11	4
3	female	72	E. coli	≥32	4	≤4	4	≤4	≤1	≤1	≤1	≤16	≤2	≤0.5	≤1	≤1	≤4	≥16	8	1	≤0.5	≤0.5	≥4	R	S	S	I	S	S	S	S	S	S	S	S	S	S	R	I	R	S	S	R	AM,GEN,CIP,SXT	MDR	－	10	11	4
4	female	78	E. coli	≥32	16	8	≥8	32	≤1	≤1	≤1	≤16	≤2	≤0.5	≤1	≤1	≤4	≥16	8	≥2	≥8	1	≥4	R	I	S	R	R	S	S	S	S	S	S	S	S	S	R	I	R	R	S	R	AM,CFZ,FOX,GEN,CIP,LEV,SXT	MDR	－	6	11	95
5	male	81	E. coli	≥32	16	16	≥8	≥64	≥4	≥16	≥4	32	>16	≤0.5	≤1	≤1	≤4	≥16	4	≥2	≥8	≤0.5	≥4	R	I	S	R	R	R	R	R	I	R	S	S	S	S	R	S	R	R	S	R	AM,CFZ,FOX,CRO,FEP,CTX,ATM,GEN,CIP,LEV,SXT	MDR	＋	6	4	12
6	male	67	E. coli	≥32	16	≤4	≥8	≤4	≥4	≥16	≥4	32	>16	≤0.5	≤1	≤1	≤4	≥16	8	≥2	≥8	≤0.5	≥4	R	I	S	R	S	R	R	R	I	R	S	S	S	S	R	I	R	R	S	R	AM,CFZ,CRO,FEP,CTX,ATM,GEN,CIP,LEV,SXT	MDR	＋	101	88	97
7	female	80	E. coli	≥32	16	8	≥8	≤4	≥4	≤1	≥4	≤16	16	≤0.5	≤1	≤1	≤4	≤4	8	≥2	≥8	≤0.5	≤2	R	I	S	R	S	R	S	R	S	R	S	S	S	S	S	I	R	R	S	S	AM,CFZ,CRO,CTX,ATM,CIP,LEV	MDR	＋	9	65	5
8	male	73	E. coli	≥32	16	≤4	≥8	≤4	≥4	2	≥4	32	4	≤0.5	≤1	≤1	≤4	≥16	8	≥2	≥8	≤0.5	≥4	R	I	S	R	S	R	S	R	I	S	S	S	S	S	R	I	R	R	S	R	AM,CFZ,CRO,CTX,GEN,CIP,LEV,SXT	MDR	＋	53	40	47
9	female	67	E. coli	≥32	4	≤4	4	≤4	≤1	≤1	≤1	8	≤2	≤0.5	≤1	≤1	≤4	≥16	8	≥2	≥8	≤0.5	≥4	R	S	S	I	S	S	S	S	S	S	S	S	S	S	R	I	R	R	S	R	AM,GEN,CIP,LEV,SXT	MDR	－	18	106	17
10	female	53	E. coli	≥32	16	≤4	≥8	≤4	≥4	2	≥4	32	>16	≤0.5	≤1	≤1	≤4	≥16	8	≥2	≥8	≤0.5	≥4	R	I	S	R	S	R	S	R	I	R	S	S	S	S	R	I	R	R	S	R	AM,CFZ,CRO,CTX,ATM,GEN,CIP,LEV,SXT	MDR	＋	53	40	47
11	female	69	E. coli	≥32	≥32	≤4	≥8	≥64	≤1	≤1	≤1	8	≤2	≤0.5	≤1	≤1	≤4	≤1	≤1	1	1	≤0.5	≥4	R	R	S	R	R	S	S	S	S	S	S	S	S	S	S	S	R	I	S	R	AM,AMC,CFZ,FOX,SXT	MDR	－	20	45	56
12	female	72	E. coli	≥32	≥32	≤4	≥8	32	8	≤1	≥4	≤16	≤2	≤0.5	≤1	≤1	≤4	≥16	8	0.5	1	≤0.5	≥4	R	R	S	R	R	R	S	R	S	S	S	S	S	S	R	I	I	I	S	R	AM,AMC,CFZ,FOX,CRO,CTX,GEN,SXT	MDR	＋	21	35	27
13	male	77	E. coli	16	8	≤4	4	16	≤1	≤1	≤1	≤16	≤2	≤0.5	≤1	≤1	≤4	≤1	≤1	≥2	≥8	≤0.5	≤2	I	S	S	I	I	S	S	S	S	S	S	S	S	S	S	S	R	R	S	S	CIP,LEV		－	92	4	87
14	male	70	E. coli	≥32	8	≤4	≥8	≤4	≥4	8	≥4	≤16	>16	≤0.5	≤1	≤1	≤4	≤1	≤1	≥2	≥8	≤0.5	≤2	R	S	S	R	S	R	SDD	R	S	R	S	S	S	S	S	S	R	R	S	S	AM,CFZ,CRO,CTX,ATM,CIP,LEV	MDR	＋	6	4	14
15	female	54	E. coli	≥32	8	≤4	≥8	≤4	≥4	2	≥4	≤16	16	≤0.5	≤1	≤1	≤4	≤1	≤1	≥2	≥8	≤0.5	≥4	R	S	S	R	S	R	S	R	S	R	S	S	S	S	S	S	R	R	S	R	AM,CFZ,CRO,CTX,ATM,CIP,LEV,SXT	MDR	＋	92	4	87
16	female	75	E. coli	≥32	8	≤4	≤2	≤4	≤1	≤1	≤1	≤16	≤2	≤0.5	≤1	≤1	≤4	≤1	≤1	≥2	≥8	≤0.5	≤2	R	S	S	S	S	S	S	S	S	S	S	S	S	S	S	S	R	R	S	S	AM,CIP,LEV		－	6	165	4
17	female	66	E. coli	4	≤2	≤4	≤2	≤4	≤1	≤1	≤1	≤16	≤2	≤0.5	≤1	≤1	8	4	≤1	≥2	≥8	≤0.5	≤2	S	S	S	S	S	S	S	S	S	S	S	S	S	S	S	S	R	R	S	S	CIP,LEV		－	6	11	95
18	female	76	E. coli	≥32	8	≤4	4	≤4	≤1	≤1	≤1	≤16	≤2	≤0.5	≤1	≤1	≤4	≥16	8	0.5	1	≤0.5	≥4	R	S	S	I	S	S	S	S	S	S	S	S	S	S	R	I	I	I	S	R	AM,GEN,SXT	MDR	－	21	35	27
19	male	38	E. coli	≥32	16	≤4	≥8	≤4	≥4	≥16	≥4	≤16	>16	≤0.5	≤1	≤1	≤4	≥16	8	≥2	≥8	≤0.5	≥4	R	I	S	R	S	R	R	R	S	R	S	S	S	S	R	I	R	R	S	R	AM,CFZ,CRO,FEP,CTX,ATM,GEN,CIP,LEV,SXT	MDR	＋	92	4	87
20	male	73	E. coli	≥32	8	≤4	≥8	32	≥4	≥16	≥4	≤16	32	≤0.5	≤1	≤1	≤4	≤1	≤1	≥2	≥8	≤0.5	≤2	R	S	S	R	R	R	R	R	S	R	S	S	S	S	S	S	R	R	S	S	AM,CFZ,FOX,CRO,FEP,CTX,ATM,CIP,LEV	MDR	＋	53	40	47
21	female	59	E. coli	≥32	16	8	≥8	8	≥4	≥16	≥4	≤16	>16	≤0.5	≤1	≤1	8	≥16	≥16	≥2	≥8	≤0.5	≥4	R	I	S	R	S	R	R	R	S	R	S	S	S	S	R	R	R	R	S	R	AM,CFZ,CRO,FEP,CTX,ATM,GEN,TOB,CIP,LEV,SXT	MDR	＋	10	4	4
22	female	13	E. coli	≥32	8	≤4	≤2	≤4	≤1	≤1	≤1	≤16	≤2	≤0.5	≤1	≤1	≤4	≥16	8	≤0.25	1	≤0.5	≥4	R	S	S	S	S	S	S	S	S	S	S	S	S	S	R	I	S	I	S	R	AM,GEN,SXT	MDR	－	37	38	19
23	male	68	E. coli	≥32	8	≤4	4	≤4	≤1	≤1	≤1	≤16	≤2	≤0.5	≤1	≤1	≤4	≥16	8	≥2	≥8	≤0.5	≥4	R	S	S	I	S	S	S	S	S	S	S	S	S	S	R	I	R	R	S	R	AM,GEN,CIP,LEV,SXT	MDR	－	53	40	47
24	female	72	E. coli	≥32	16	≤4	4	8	≤1	≤1	≤1	≤16	≤2	≤0.5	≤1	≤1	≤4	≥16	8	0.5	1	≤0.5	≤2	R	I	S	I	S	S	S	S	S	S	S	S	S	S	R	I	I	I	S	S	AM,GEN		－	21	35	27
25	male	65	E. coli	≥32	8	≤4	≥8	≤4	≥4	2	≥4	≤16	16	≤0.5	≤1	≤1	≤4	≥16	8	0.5	1	≤0.5	≥4	R	S	S	R	S	R	S	R	S	R	S	S	S	S	R	I	I	I	S	R	AM,CFZ,CRO,CTX,ATM,GEN,SXT	MDR	＋	53	40	47
26	female	66	E. coli	≥32	4	≤4	≥8	≤4	≥4	≤1	≥4	≤16	≤2	≤0.5	≤1	≤1	4	≤1	≤1	≥2	≥8	≤0.5	≤2	R	S	S	R	S	R	S	R	S	S	S	S	S	S	S	S	R	R	S	S	AM,CFZ,CRO,CTX,CIP,LEV	MDR	＋	4	26	2
27	female	63	E. coli	≥32	4	≤4	≥8	≤4	≥4	≤1	≥4	≤16	≤2	≤0.5	≤1	≤1	≤4	≤1	≤1	≥2	≥8	≤0.5	≥4	R	S	S	R	S	R	S	R	S	S	S	S	S	S	S	S	R	R	S	R	AM,CFZ,CRO,CTX,CIP,LEV,SXT	MDR	＋	14	14	10
28	female	27	E. coli	≥32	8	≤4	≤2	≤4	≤1	≤1	≤1	≤16	≤2	≤0.5	≤1	≤1	≤4	≤1	≤1	≥2	≥8	≤0.5	≥4	R	S	S	S	S	S	S	S	S	S	S	S	S	S	S	S	R	R	S	R	AM,CIP,LEV,SXT	MDR	－	21	35	27
29	male	65	E. coli	≥32	16	8	≤2	≤4	≤1	≤1	≤1	≤16	≤2	≤0.5	≤1	≤1	≤4	≤1	≤1	0.5	1	≤0.5	≤2	R	I	S	S	S	S	S	S	S	S	S	S	S	S	S	S	I	I	S	S	AM		－	36	24	9
30	female	67	E. coli	≥32	8	≤4	≤2	≤4	≤1	≤1	≤1	≤16	≤2	≤0.5	≤1	≤1	≤4	≥16	8	0.5	1	≤0.5	≥4	R	S	S	S	S	S	S	S	S	S	S	S	S	S	R	I	I	I	S	R	AM,GEN,SXT	MDR	－	21	35	27
31	male	87	E. coli	≥32	8	≤4	≥8	≤4	≥4	≥16	≥4	≤16	>16	≤0.5	≤1	≤1	8	4	≤1	≥2	≥8	≤0.5	≤2	R	S	S	R	S	R	R	R	S	R	S	S	S	S	S	S	R	R	S	S	AM,CFZ,CRO,FEP,CTX,ATM,CIP,LEV	MDR	＋	53	40	47
32	male	57	E. coli	≥32	8	≤4	≤2	≤4	≤1	≤1	≤1	≤16	≤2	≤0.5	≤1	≤1	≤4	≥16	8	≤0.25	1	≤0.5	≤2	R	S	S	S	S	S	S	S	S	S	S	S	S	S	R	I	S	I	S	S	AM,GEN		－	53	40	47
33	male	58	E. coli	≥32	16	8	≥8	≤4	≥4	≥16	≥4	≤16	>16	≤0.5	≤1	≤1	4	≤1	8	≥4	≥8	≤0.5	≤2	R	I	S	R	S	R	R	R	S	R	S	S	S	S	S	I	R	R	S	S	AM,CFZ,CRO,FEP,CTX,ATM,CIP,LEV	MDR	＋	53	40	47
34	female	48	E. coli	≤2	≤2	≤4	≤2	≤4	≤1	≤1	≤1	≤16	≤2	≤0.5	≤1	≤1	≤4	≤1	≤1	≤0.25	≤0.25	≤0.5	≤2	S	S	S	S	S	S	S	S	S	S	S	S	S	S	S	S	S	S	S	S			－	36	24	9
35	male	57	E. coli	≥32	8	≤4	≥8	≤4	≥4	8	≥4	32	>16	≤0.5	≤1	≤1	≤4	≤1	≤1	≥2	≥8	≤0.5	≤2	R	S	S	R	S	R	SDD	R	I	R	S	S	S	S	S	S	R	R	S	S	AM,CFZ,CRO,CTX,ATM,CIP,LEV	MDR	＋	8	7	1
36	male	68	E. coli	≥32	16	≤4	≥8	8	≥4	4	≥4	32	4	≤0.5	≤1	≤1	≤4	≤1	≤1	≥2	≥8	≤0.5	≤2	R	I	S	R	S	R	SDD	R	I	S	S	S	S	S	S	S	R	R	S	S	AM,CFZ,CRO,CTX,CIP,LEV	MDR	＋	8	7	1
37	male	66	E. coli	≤2	≤2	≤4	≤2	≤4	≤1	≤1	≤1	8	≤2	≤0.5	≤1	≤1	≤4	≤1	≤1	≤0.25	0.5	≤0.5	≤2	S	S	S	S	S	S	S	S	S	S	S	S	S	S	S	S	S	S	S	S			－	36	24	9
38	male	65	E. coli	≥32	8	≤4	≥8	≤4	≥4	2	≥4	≤16	16	≤0.5	≤1	≤1	≤4	≥16	8	≤0.25	1	≤0.5	≤2	R	S	S	R	S	R	S	R	S	R	S	S	S	S	R	I	S	I	S	S	AM,CFZ,CRO,CTX,ATM,GEN	MDR	＋	4	26	2
39	female	39	E. coli	≥32	8	≤4	≤2	≤4	≤1	≤1	≤1	≤16	≤2	≤0.5	≤1	≤1	≤4	≤1	≤1	≤0.25	1	≤0.5	≥4	R	S	S	S	S	S	S	S	S	S	S	S	S	S	S	S	S	I	S	R	AM,SXT		－	21	35	27
40	female	52	E. coli	≥32	8	≤4	≥8	≤4	32	2	≥4	≤16	≤2	≤0.5	≤1	≤1	≤4	≤1	≤1	1	1	≤0.5	≤2	R	S	S	R	S	R	S	R	S	S	S	S	S	S	S	S	R	I	S	S	AM,CFZ,CRO,CTX,CIP	MDR	＋	21	35	27
41	male	76	E. coli	≥32	8	≤4	≥8	≤4	≥4	2	≥4	≤16	32	≤0.5	≤1	≤1	≤4	≥16	8	≥2	≥8	≤0.5	≤2	R	S	S	R	S	R	S	R	S	R	S	S	S	S	R	I	R	R	S	S	AM,CFZ,CRO,CTX,ATM,GEN,CIP,LEV	MDR	＋	14	14	10
42	male	61	E. coli	≥32	16	≤4	≥8	≤4	≤1	≤1	≤1	≤16	≤2	≤0.5	≤1	≤1	≤4	≤1	≤1	≤0.25	1	≤0.5	≤2	R	I	S	R	S	S	S	S	S	S	S	S	S	S	S	S	S	I	S	S	AM		－	36	24	9
43	female	70	E. coli	≥32	8	≤4	≥8	≤4	≤1	≤1	≤1	≤16	≤2	≤0.5	≤1	≤1	≤4	≤1	≤1	≤0.25	1	≤0.5	≥4	R	S	S	R	S	S	S	S	S	S	S	S	S	S	S	S	S	I	S	R	AM,SXT		－	6	23	14
44	male	55	E. coli	8	4	≤4	≥8	≤4	≤1	≤1	≤1	8	≤2	≤0.5	≤1	≤1	≤4	≤1	≤1	≥2	≥8	≤0.5	≤2	S	S	S	R	S	S	S	S	S	S	S	S	S	S	S	S	R	R	S	S	CIP,LEV		－	6	23	14
45	female	79	E. coli	≥32	8	≤4	≥8	8	≥4	4	≥4	32	>16	≤0.5	≤1	≤1	≤4	≥16	8	≥2	≥8	≤0.5	≥4	R	S	S	R	S	R	SDD	R	I	R	S	S	S	S	R	I	R	R	S	R	AM,CFZ,CRO,CTX,ATM,GEN,CIP.LEV,SXT	MDR	＋	21	35	27
46	female	69	E. coli	≥32	16	≤4	≥8	≥32	≥4	≥16	≥4	32	16	≤0.5	≤1	≤1	≤4	≥16	8	≥2	≥8	≤0.5	≥4	R	I	S	R	R	R	R	R	I	R	S	S	S	S	R	I	R	R	S	R	AM,CFZ,FOX,CRO,FEP,CTX,ATM,GEN,CIP,LEV,SXT	MDR	＋	40	13	9
47	female	51	E. coli	≥32	16	≤4	≥8	≥32	≥4	≥16	≥4	32	>16	≤0.5	≤1	≤1	≤4	≥16	8	≥2	≥8	≤0.5	≥4	R	I	S	R	R	R	R	R	I	R	S	S	S	S	R	I	R	R	S	R	AM,CFZ,FOX,CRO,FEP,CTX,ATM,GEN,CIP,LEV,SXT	MDR	＋	53	40	47
48	male	79	E. coli	≥32	8	≤4	≤2	≤4	≤1	≤1	≤1	≤16	≤2	≤0.5	≤1	≤1	≤4	≤1	≤1	≥2	≥8	≤0.5	≥4	R	S	S	S	S	S	S	S	S	S	S	S	S	S	S	S	R	R	S	R	AM,CIP,LEV,SXT	MDR	－	21	35	27
49	female	54	E. coli	≥32	8	≤4	≤2	≤4	≤1	≤1	≤1	≤16	≤2	≤0.5	≤1	≤1	≤4	≥16	8	≥2	≥8	≤0.5	≤2	R	S	S	S	S	S	S	S	S	S	S	S	S	S	R	I	R	R	S	S	AM,GEN,CIP,LEV	MDR	－	14	14	10
50	male	47	E. coli	≥32	≥32	≤4	≥8	≥32	≥4	≤1	≥4	≤16	>16	≤0.5	≤1	≤1	≤4	≥16	8	≤0.25	1	≤0.5	≤2	R	R	S	R	R	R	S	R	S	R	S	S	S	S	R	I	S	I	S	S	AM,AMC,CFZ,FOX,CRO,CTX,ATM,GEN	MDR	＋	21	35	27
51	female	49	E. coli	≥32	16	≤4	≥8	≤4	≥4	≤1	≥4	≤16	≤2	≤0.5	≤1	≤1	≤4	8	8	0.5	1	≤0.5	≥4	R	I	S	R	S	R	S	R	S	S	S	S	S	S	I	I	I	I	S	R	AM,CFZ,CRO,CTX,SXT	MDR	＋	53	40	47
52	female	62	E. coli	≥32	16	≤4	≤2	≤4	≤1	≤1	≤1	≤16	≤2	≤0.5	≤1	≤1	≤4	≤1	≤1	≥2	1	≤0.5	≤2	R	I	S	S	S	S	S	S	S	S	S	S	S	S	S	S	R	I	S	S	AM,CIP		－	112	11	5
53	male	78	E. coli	8	4	≤4	≤2	≤4	≤1	≤1	≤1	≤16	≤2	≤0.5	≤1	≤1	≤4	≤1	≤1	≥2	≥8	≤0.5	≥4	S	S	S	S	S	S	S	S	S	S	S	S	S	S	S	S	R	R	S	R	CIP,LEV,SXT		－	14	14	10
54	female	55	E. coli	≥32	4	≤4	≥8	≤4	≥4	4	≥4	32	>16	≤0.5	≤1	≤1	≤4	≥16	8	≥2	≥8	≤0.5	≥4	R	S	S	R	S	R	SDD	R	I	R	S	S	S	S	R	I	R	R	S	R	AM,CFZ,CRO,CTX,ATM,GEN,CIP,LEV,SXT	MDR	＋	35	37	29
55	female	43	E. coli	≥32	16	≤4	≤2	≤4	≤1	≤1	≤1	8	≤2	@<=0.5	@<=1	≤1	≤4	≤1	≤1	≥2	≥8	≤0.5	≥4	R	I	S	S	S	S	S	S	S	S	S	S	S	S	S	S	R	R	S	R	AM,CIP,LEV,SXT	MDR	－	21	35	27
56	male	60	E. coli	≥32	≥32	≤4	≥8	≥32	≥4	≥16	≥4	≥64	>16	@<=0.5	@<=1	≤1	≤4	≥16	8	≥2	≥8	≤0.5	≤2	R	R	S	R	R	R	R	R	R	R	S	S	S	S	R	I	R	R	S	S	AM,AMC,CFZ,FOX,CRO,FEP,CTX,CPS,ATM,GEN,CIP,LEV	MDR	＋	14	14	10
57	female	60	E. coli	≥32	16	≤4	≥8	32	≥4	2	≥4	≤16	2	@<=0.5	@<=1	≤1	≤4	≥16	8	≥2	≥8	≤0.5	≥4	R	I	S	R	R	R	S	R	S	S	S	S	S	S	R	I	R	R	S	R	AM,CFZ,FOX,CRO,CTX,GEN,CIP,LEV,SXT	MDR	＋	4	26	2
58	male	48	E. coli	≥32	8	≤4	≥8	≤4	8	≤1	≥4	≤16	≤2	@<=0.5	@<=1	≤1	≤4	≥16	4	≥2	≥8	≤0.5	≤2	R	S	S	R	S	R	S	R	S	S	S	S	S	S	R	S	R	R	S	S	AM,CFZ,CRO,CTX,GEN,CIP,LEV	MDR	＋	4	26	2
59	female	34	E. coli	≥32	16	≤4	8	8	≤1	≤1	≤1	≤16	≤2	@<=0.5	@<=1	≤1	≤4	≥16	8	≤0.25	1	≤0.5	≤2	R	I	S	R	S	S	S	S	S	S	S	S	S	S	R	I	S	I	S	S	AM,CFZ,GEN	MDR	－	4	26	2
60	female	63	E. coli	≥32	4	≤4	≤2	≤4	≤1	≤1	≤1	≤16	≤2	@<=0.5	@<=1	≤1	≤4	≥16	8	1	1	≤0.5	≥4	R	S	S	S	S	S	S	S	S	S	S	S	S	S	R	I	R	I	S	R	AM,GEN,CIP,SXT	MDR	－	53	40	47
61	male	73	E. coli	≥32	8	≤4	≥8	8	16	2	≥4	≤16	2	@<=0.5	@<=1	≤1	≤4	≥16	8	≥2	≥8	≤0.5	≤2	R	S	S	R	S	R	S	R	S	S	S	S	S	S	R	I	R	R	S	S	AM,CFZ,CRO,CTX,GEN,CIP,LEV	MDR	＋	35	37	29
62	female	69	E. coli	≥32	8	≤4	≥8	≤4	≥4	2	≥4	≤16	4	@<=0.5	@<=1	≤1	≤4	≤1	≤1	≤0.25	1	≤0.5	≤2	R	S	S	R	S	R	S	R	S	S	S	S	S	S	S	S	S	I	S	S	AM,CFZ,CRO,CTX		＋	53	40	47
63	female	31	E. coli	≥32	16	≤4	≥8	8	≤1	≤1	≤1	≤16	≤2	@<=0.5	@<=1	≤1	≤4	≥16	8	≤0.25	1	≤0.5	≤2	R	I	S	R	S	S	S	S	S	S	S	S	S	S	R	I	S	I	S	S	AM,GEN		－	92	4	87
64	male	61	E. coli	≥32	8	≤4	≥8	≤4	≥4	4	≥4	≤16	>16	@<=0.5	@<=1	≤1	≤4	≥16	8	≥2	≥8	≤0.5	≥4	R	S	S	R	S	R	SDD	R	S	R	S	S	S	S	R	I	R	R	S	R	AM,CFZ,CRO,CTX,ATM,GEN,CIP,LEV,SXT	MDR	＋	53	40	47
65	male	53	E. coli	≥32	4	≤4	≥8	≤4	≥4	4	≥4	≤16	16	@<=0.5	@<=1	≤1	≤4	≥16	≤4	≥2	≥8	≤0.5	≥4	R	S	S	R	S	R	SDD	R	S	R	S	S	S	S	R	S	R	R	S	R	AM,CFZ,CRO,CTX,ATM,GEN,CIP,LEV,SXT	MDR	＋	53	40	47
66	female	33	E. coli	≥32	16	≤4	≤2	8	≤1	≤1	≤1	≤16	≤2	@<=0.5	@<=1	≤1	≤4	≥16	8	≤0.25	1	≤0.5	≤2	R	I	S	S	S	S	S	S	S	S	S	S	S	S	R	I	S	I	S	S	AM,GEN		－	4	26	2
67	female	67	E. coli	≥32	8	≤4	≥8	8	≥4	≤1	≥4	≤16	16	@<=0.5	@<=1	≤1	≤4	8	≥16	≥2	≥8	≤0.5	≤2	R	S	S	R	S	R	S	R	S	R	S	S	S	S	I	R	R	R	S	S	AM,CFZ,CRO,CTX,ATM,TOB,CIP,LEV	MDR	＋	20	45	41
68	female	77	E. coli	≥32	4	≤4	≥8	≤4	≥4	2	≥4	≤16	4	@<=0.5	@<=1	≤1	≤4	≤1	≤1	≥2	≥8	≤0.5	≥4	R	S	S	R	S	R	S	R	S	S	S	S	S	S	S	S	R	R	S	R	AM,CFZ,CRO,CTX,CIP,LEV,SXT	MDR	＋	53	40	47
69	female	56	E. coli	≤2	≤2	≤4	≤2	≤4	≤1	≤1	≤1	≤16	≤2	@<=0.5	@<=1	≤1	≤4	≤1	≤1	≤0.25	≤0.25	≤0.5	≤2	S	S	S	S	S	S	S	S	S	S	S	S	S	S	S	S	S	S	S	S			－	10	11	1
70	male	62	E. coli	≥32	≥32	64	≥8	≥32	≥4	≥16	≥4	32	>16	@<=0.5	@<=1	≤1	≤4	≥16	8	≥2	≥8	≤0.5	≥4	R	R	I	R	R	R	R	R	I	R	S	S	S	S	R	I	R	R	S	R	AM,AMC,CFZ,FOX,CRO,FEP,CTX,ATM,GEN,CIP,LEV,SXT	MDR	＋	4	26	2
71	female	36	E. coli	≥32	8	≤4	≤2	≤4	≤1	≤1	≤1	≤16	≤2	@<=0.5	@<=1	≤1	≤4	≤1	≤1	≤0.25	1	≤0.5	≤2	R	S	S	S	S	S	S	S	S	S	S	S	S	S	S	S	S	I	S	S	AM		－	10	11	4
72	male	81	E. coli	≥32	8	≤4	≥8	≤4	≥4	≤1	≥4	≤16	≤2	@<=0.5	@<=1	≤1	≤4	≤1	≤1	≥2	≥8	≤0.5	≤2	R	S	S	R	S	R	S	R	S	S	S	S	S	S	S	S	R	R	S	S	AM,CFZ,CRO,CTX,CIP,LEV	MDR	＋	6	11	95
73	female	85	E. coli	≥32	8	≤4	≤2	≤4	≤1	≤1	≤1	≤16	≤2	@<=0.5	@<=1	≤1	≤4	≤1	≤1	0.5	1	≤0.5	≤2	R	S	S	S	S	S	S	S	S	S	S	S	S	S	S	S	I	I	S	S	AM		－	21	35	27
74	male	56	E. coli	≥32	16	≤4	≥8	≤4	≥4	2	≥4	≤16	2	@<=0.5	@<=1	≤1	≤4	≥16	8	≥2	≥8	≤0.5	≥4	R	I	S	R	S	R	S	R	S	S	S	S	S	S	R	I	R	R	S	R	AM,CFZ,CRO,CTX,GEN,CIP,LEV,SXT	MDR	＋	35	37	29
75	male	55	E. coli	≥32	8	≤4	≥8	≤4	≥4	2	≥4	≤16	16	@<=0.5	@<=1	≤1	≤4	≤1	≤1	≥2	≥8	≤0.5	≥4	R	S	S	R	S	R	S	R	S	R	S	S	S	S	S	S	R	R	S	R	AM,CFZ,CRO,CTX,ATM,CIP,LEV,SXT	MDR	＋	20	45	41
76	male	55	E. coli	≥32	16	≤4	≥8	≤4	≥4	≤1	≥4	≤16	≤2	@<=0.5	@<=1	≤1	≤4	≥16	≥16	≥2	≥8	≤0.5	≤2	R	I	S	R	S	R	S	R	S	S	S	S	S	S	R	R	R	R	S	S	AM,CFZ,CRO,CTX,GEN,TOB,CIP,LEV	MDR	＋	4	26	2
[truncated: 23 more columns]
